# Supplementary material for: Cellular uptake behavior of [γ32P] labeled ATP–LDH nanohybrids
Source: Royal Society of Chemistry journal article supplement (doi:10.1039/b008680k), 2001-01-01
Supplement: b008680k.doc [file b008680k.doc]

**1. The histogram for Mg-solubility of Mg2Al-LDH as function of pH.**

In order to describe the pH dependent Mg2Al-LDH solubility, it has been measured that the amount of Mg ion resolved from Mg2Al-LDH in each pH aqueous solution after 24hrs. We can theoretically expect that LDHs will be dissolved in endosome (pH 4~5) or cytosol.

**Figure S-1.** The amount of Mg ion resolved from Mg2Al-LDH for 24 hrs at room temperature.

**2. FITC-LDH exchange rate according to NaCl concentration.**

A fixed amount of FITC-LDH was added to the 1, 110-1, 110-2, 110-3, 110-4, 110-5, and 110-6 M NaCl solutions, and incubated at 37 °C for 8 hrs. After centrifugation to remove nanoparticles, the resulting supernatant was collected to measure fluorescence intensity. The histogram means that interlayer FITC molecules are partially replaced by Cl- in aqueous solution and also in case of the similar to body fluids, 110-2 or 110-3, the 23~35 % of interlayer FITC molecules can be released for 8 hours.

**Figure S-2.** FITC-LDH exchange capacity at various NaCl concentrations. 1 M of FITC-LDH was added to 1, 110-1, 110-2, 110-3, 110-4, 110-5, and 110-6 M NaCl solution, respectively, and incubated at 37 ºC for 8hrs. After centrifugation to remove nanoparticles, the resulting supernatant was collected to measure fluorescence intensity.

**3. Cytotoxicity test of Mg2Al-NO3--LDH itself.**

**Figure S-3.** Cytotoxicity experiment of LDH in HL-60 cells. Various amounts of LDH were added to cells at final concentrations from 1  g/ml to 1000 g/ml.
